# Supplementary material for: Global analyses of biosynthetic gene clusters in phytobiomes reveal strong phylogenetic conservation of terpenes and aryl polyenes
Source: PubMed Central journal article supplement (PMC10469690; doi:10.1128/msystems.00387-23), 2023-07-06
Supplement: reviewer-comments.pdf [file reviewer-comments.pdf]

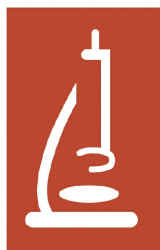

AMERICAN  
SOCIETY FOR  
MICROBIOLOGY

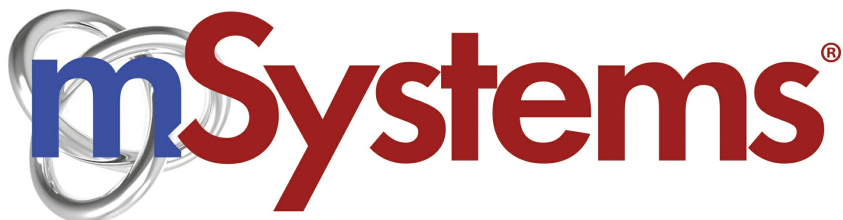

# Global analyses of biosynthetic gene clusters in phytobiomes reveal strong phylogenetic conservation of terpenes and aryl polyenes

Arijit Mukherjee, Hitesh Tikariha, Aditya Bandla, Shruti Pavagadhi, and Sanjay Swarup

*Corresponding Author(s): Sanjay Swarup, National University of Singapore*

---

## Review Timeline:

|                     |                |
|---------------------|----------------|
| Submission Date:    | April 21, 2023 |
| Editorial Decision: | May 15, 2023   |
| Revision Received:  | May 18, 2023   |
| Accepted:           | May 30, 2023   |

---

*Editor: Aurélie Deveau*

*Reviewer(s): The reviewers have opted to remain anonymous.*

## Transaction Report:

(Note: With the exception of the correction of typographical or spelling errors that could be a source of ambiguity, letters and reports are not edited. The original formatting of letters and referee reports may not be reflected in this compilation.)

**DOI:** <https://doi.org/10.1128/msystems.00387-23>

May 15, 2023

Dr. Sanjay Swarup  
National University of Singapore  
Singapore  
Singapore

Re: mSystems00387-23 (Global analyses of biosynthetic gene clusters in phytobiomes reveal strong phylogenetic conservation of terpenes and aryl polyenes)

Dear Dr. Sanjay Swarup:

Thank you for submitting your manuscript to mSystems. We have completed our review and I am pleased to inform you that, in principle, we expect to accept it for publication in mSystems. However, acceptance will not be final until you have adequately addressed the reviewer comments.

Both reviewers appreciated the efforts made to answer their comments and found that the results greatly improve the manuscript. However, one reviewer suggested some minor improvements to enhance the readability of the manuscript. Please make these few corrections.

Thank you for the privilege of reviewing your work. Below you will find instructions from the mSystems editorial office and comments generated during the review.

### Preparing Revision Guidelines

To submit your modified manuscript, log onto the eJP submission site at <https://msystems.msubmit.net/cgi-bin/main.plex>. Go to Author Tasks and click the appropriate manuscript title to begin the revision process. The information that you entered when you first submitted the paper will be displayed. Please update the information as necessary. Here are a few examples of required updates that authors must address:

- Point-by-point responses to the issues raised by the reviewers in a file named "Response to Reviewers," NOT IN YOUR COVER LETTER.
- Upload a compare copy of the manuscript (without figures) as a "Marked-Up Manuscript" file.
- Each figure must be uploaded as a separate file, and any multipanel figures must be assembled into one file.
- Manuscript: A .DOC version of the revised manuscript
- Figures: Editable, high-resolution, individual figure files are required at revision, TIFF or EPS files are preferred

ASM policy requires that data be available to the public upon online posting of the article, so please verify all links to sequence records, if present, and make sure that each number retrieves the full record of the data. If a new accession number is not linked or a link is broken, provide production staff with the correct URL for the record. If the accession numbers for new data are not publicly accessible before the expected online posting of the article, publication of your article may be delayed; please contact the ASM production staff immediately with the expected release date.

For complete guidelines on revision requirements, please see the journal Submission and Review Process requirements at <https://journals.asm.org/journal/mSystems/submission-review-process>. **Submission of a paper that does not conform to mSystems guidelines will delay acceptance of your manuscript.**

Please return the manuscript within 60 days; if you cannot complete the modification within this time period, please contact me. If you do not wish to modify the manuscript and prefer to submit it to another journal, please notify me of your decision immediately so that the manuscript may be formally withdrawn from consideration by mSystems.

Corresponding authors may [join or renew ASM membership](#) to obtain discounts on publication fees. Need to upgrade your membership level? Please contact Customer Service at [Service@asmusa.org](mailto:Service@asmusa.org).

Thank you for submitting your paper to mSystems.

The ASM Journals program strives for constant improvement in our submission and publication process. Please tell us how we can improve your experience by taking this quick [Author Survey](#).

Sincerely,

Aur lie Deveau

Editor, mSystems

Journals Department  
American Society for Microbiology  
1752 N St., NW  
Washington, DC 20036  
E-mail: mSystems@asmusa.org

**Reviewer comments:**

Reviewer #1 (Comments for the Author):

The paper by Mukherejee et al. describes a genomic analysis of bacteria from phytobiomes and the link between BGCs and their conservation in these systems with an emphasis on the presence of terpenes and aryl polyenes. The article was well written and has even improved after revision.

Reviewer #2 (Comments for the Author):

I acknowledge the effort put in by the authors to address the initial review comments, and their new analyses have considerably reinforced their initial conclusion. The manuscript could still benefit from some minor refinements. I provide some examples below

Minor comments:

P6 line 164: For "JGI" spell out what this abbreviation and give website or citation to specific database that was used for analysis.

P8 line 250: "To obtain more" should be "To obtain a more..."

P9 line 254: "to reconstruct best..." should read "to reconstruct the best..."

P9 line 274: Does "bray" refer to Bray-Curtis dissimilarity? please define and add a citation.

P11 line 343: It's not clear to the reviewer what "processed" specifically refers to? Are you just saying that taxonomy was assigned to each genome? If so how?

P12 line 358: Again, not clear what "80% of the alignment has gaps" specifically is referring to? Please clarify. Same line is "BMGE" abbreviation defined somewhere?

P12 line 377: Somewhere in the document wording needs to be made obvious---by "plant isolates" you mean "bacterial isolates" from plants or soil.

P14 line 419: "Streptomces" should be "Streptomyces" and "sp." should not be italicized.

P14 line 425: Should Mesorhizobium, Bradyrhizobium, Rhizobium be italicized?

P18 line 539: Please define what is meant by GCFs?

*I acknowledge the effort put in by the authors to address the initial review comments, and their new analyses have considerably reinforced their initial conclusion. The manuscript could still benefit from some minor refinements. I provide some examples below.*

Minor comments:

P6 line 164: For “JGI” spell out what this abbreviation and give website or citation to specific database that was used for analysis.

P8 line 250: “To obtain more” should be “To obtain a more...”

P9 line 254: “to reconstruct best...” should read “to reconstruct the best...”

P9 line 274: Does “bray” refer to Bray-Curtis dissimilarity? please define and add a citation.

P11 line 343: It’s not clear to the reviewer what “processed” specifically refers to? Are you just saying that taxonomy was assigned to each genome? If so how?

P12 line 358: Again, not clear what “80% of the alignment has gaps” specifically is referring to? Please clarify. Same line is “BMGE” abbreviation defined somewhere?

P12 line 377: Somewhere in the document wording needs to be made obvious---by "plant isolates" you mean "bacterial isolates" from plants or soil.

P14 line 419: “*Streptomces*” should be “*Streptomyces*” and “sp.” should not be italicized.

P14 line 425: Should *Mesorhizobium*, *Bradyrhizobium*, *Rhizobium* be italicized?

P18 line 539: Please define what is meant by GCFs?

## RESPONSE TO REVIEWERS (mSystems00387-23R1)

Global analyses of biosynthetic gene clusters in phytobiomes reveal strong phylogenetic conservation of terpenes and aryl polyenes

Authors:

Arijit Mukherjee, Hitesh Tikariha, Aditya Bandla, Shruti Pavagadhi, and Sanjay Swarup

The responses to the reviewer's comments are highlighted in blue and are provided on a point-by-point basis.

### **Reviewer #1 (Comments for the Author):**

The paper by Mukherejee et al. describes a genomic analysis of bacteria from phytobiomes and the link between BGCs and their conservation in these systems with an emphasis on the presence of terpenes and aryl polyenes. The article was well written and has even improved after revision.

Response:

We thank the reviewer for constructive suggestions for improving the manuscript.

Reviewer #2 (Comments for the Author):

I acknowledge the effort put in by the authors to address the initial review comments, and their new analyses have considerably reinforced their initial conclusion. The manuscript could still benefit from some minor refinements.

Minor comments:

Response:

Point by point responses for each of the comments are provided below-

P6 line 164: For "JGI" spell out what this abbreviation and give website or citation to specific database that was used for analysis.

We have now included the abbreviation and website for JGI in this revised manuscript. See line 164 in the revised manuscript.

P8 line 250: "To obtain more" should be "To obtain a more..."

We have now incorporated this change in the revised manuscript. Please see line 247 in this revised manuscript.

P9 line254: "to reconstruct best..." should read "to reconstruct the best..."

We have now incorporated this change in the revised manuscript. Please see line 251 in this revised manuscript.

P9 line 274: Does "bray" refer to Bray-Curtis dissimilarity? please define and add a citation.

Yes, 'bray' refers to the Bray-Curtis dissimilarity. We have now added a citation for this dissimilarity measure. See line 266 in the revised manuscript.

P11 line 343: It's not clear to the reviewer what "processed" specifically refers to? Are you just saying that taxonomy was assigned to each genome? If so how?

Indeed, the previous version implied that we have processed the network sequences to assign taxonomy. However, we only overlaid the taxonomic information of the genomes for the sequence networks. Therefore, we have now rephrased the sentence as -

"The network file of terpenes containing GCF information of both plant isolates and plant MAGs obtained from BiG-SCAPE were overlaid with taxonomic information (at the class level) of the genomes."

See line 336-340 in the revised manuscript.

P12 line 358: Again, not clear what "80% of the alignment has gaps" specifically is referring to? Please clarify. Same line is "BMGE" abbreviation defined somewhere?

While aligning amino acid sequences, we generally encounter some gaps since the sequences are not identical. Since in this case there are large variations among the sequences, we observed an overall 80% gap among the aligned sequences.

We have now added the abbreviation of BMGE (Block Mapping and Gathering with Entropy). See line 250 in the revised manuscript.

P12 line377: Somewhere in the document wording needs to be made obvious---by "plant isolates" you mean "bacterial isolates" from plants or soil.

We have now made it obvious that by 'plant isolates' we mean bacterial isolates from plants. Same is indicated for soil isolates, plant MAGs, and soil MAGs. See line 130-135 in the revised manuscript-

"First, we collated phytobiome datasets from cultured bacterial isolates (referred as 'plant isolates') and metagenome-assembled genomes (referred as 'plant MAGs') and included soil-associated cultured bacterial isolates (referred as 'soil isolates') and MAGs (referred as 'soil MAGs') as reference."

P14 line 419: "Streptomces" should be "Streptomyces" and "sp." should not be italicized.

We have incorporated the change as suggested. See line 415 in the revised manuscript.

P14 line 425: Should Mesorhizobium, Bradyrhizobium, Rhizobium be italicized?

We have incorporated the change as suggested. See line 420-421 in the revised manuscript.

P18 line 539: Please define what is meant by GCFs?

We have previously mentioned the meaning of GCF i.e. Gene Cluster Family in this manuscript. See line 228 in this revised submission.

May 30, 2023

Dr. Sanjay Swarup  
National University of Singapore  
Singapore  
Singapore

Re: mSystems00387-23R1 (Global analyses of biosynthetic gene clusters in phytobiomes reveal strong phylogenetic conservation of terpenes and aryl polyenes)

Dear Dr. Sanjay Swarup:

Your manuscript has been accepted, and I am forwarding it to the ASM Journals Department for publication. For your reference, ASM Journals' address is given below. Before it can be scheduled for publication, your manuscript will be checked by the mSystems production staff to make sure that all elements meet the technical requirements for publication. They will contact you if anything needs to be revised before copyediting and production can begin. Otherwise, you will be notified when your proofs are ready to be viewed.

ASM policy requires that data be available to the public upon online posting of the article, so please verify all links to sequence records, if present, and make sure that each number retrieves the full record of the data. If a new accession number is not linked or a link is broken, provide production staff with the correct URL for the record. If the accession numbers for new data are not publicly accessible before the expected online posting of the article, publication of your article may be delayed; please contact the ASM production staff immediately with the expected release date.

As an open-access publication, mSystems receives no financial support from paid subscriptions and depends on authors' prompt payment of publication fees as soon as their articles are accepted.

**Publication Fees:** We have partnered with Copyright Clearance Center to collect author charges. You will soon receive a message from no-reply@copyright.com with further instructions. For questions related to paying charges through RightsLink, please contact Copyright Clearance Center by email at ASM\_Support@copyright.com or toll free at +1.877.622.5543. Hours of operation: 24 hours per day, 7 days per week. Copyright Clearance Center makes every attempt to respond to all emails within 24 hours. For a complete list of **Publication Fees**, including supplemental material costs, please visit our [website](#).

Corresponding authors may [join or renew ASM membership](#) to obtain discounts on publication fees. Need to upgrade your membership level? Please contact Customer Service at Service@asmusa.org.

If you would like to submit a potential Featured Image, please email a file and a short legend to msystems@asmusa.org. Please note that we can only consider images that (i) the authors created or own and (ii) have not been previously published. By submitting, you agree that the image can be used under the same terms as the published article. File requirements: square dimensions (4" x 4"), 300 dpi resolution, RGB colorspace, TIF file format.

**For mSystems research articles**, you are welcome to submit a short author video for your recently accepted paper. Videos are normally 1 minute long and are a great opportunity for junior authors to get greater exposure. Importantly, this video will not hold up the publication of your paper, and you can submit it at any time.

Details of the video are:

- Minimum resolution of 1280 x 720
- .mov or .mp4. video format
- Provide video in the highest quality possible, but do not exceed 1080p
- Provide a still/profile picture that is 640 (w) x 720 (h) max
- Provide the script that was used

We recognize that the video files can become quite large, and so to avoid quality loss ASM suggests sending the video file via <https://www.wetransfer.com/>. When you have a final version of the video and the still ready to share, please send it to mSystems staff at msystems@asmusa.org.

Thank you for submitting your paper to mSystems.



Sincerely,

Aurélie Deveau  
Editor, mSystems

Journals Department  
American Society for Microbiology  
1752 N St., NW  
Washington, DC 20036  
E-mail: [mSystems@asmusa.org](mailto:mSystems@asmusa.org)
